# Supplementary material
Source: PubMed Central journal article supplement (PMC5548423)
Supplement: NIHMS883121-supplement.pdf [file NIHMS883121-supplement.pdf]

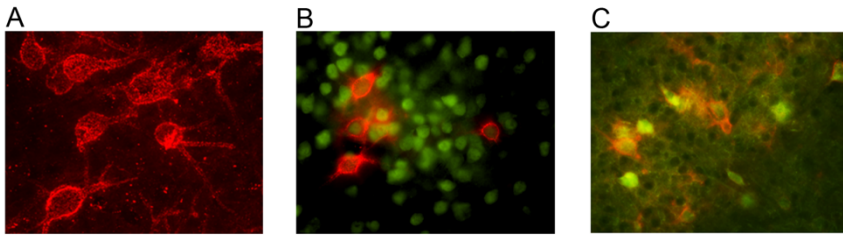

1

2

3 **Figure S1. Related to Figures 5 and 6. PNN expression in the auditory cortex of control mice**

4 PNNs can be visualized by fluorescently tagged *Wisteria floribunda* agglutinin immunohistochemistry

5 (A). PNNs colocalize with neuronal marker NeuN (B) and with Parvalbumin expressing neurons (C).

6

7

8

9

10

11



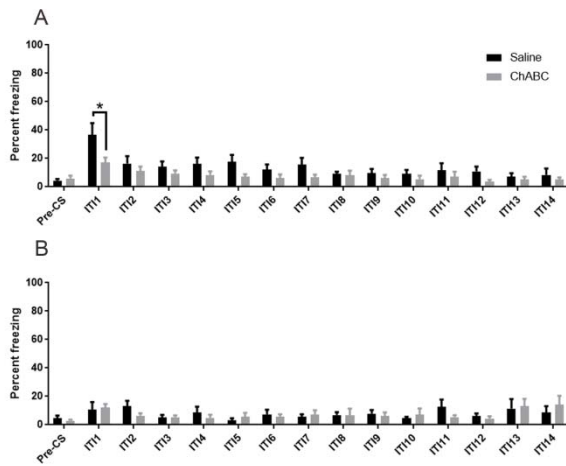

23

24 **Figure S3. Related to Figure 6. Inter-trial Intervals (ITIs) for Experiment 7**

25 Freezing during the inter-trial-interval between playbacks of the tone were not different between  
 26 treatment groups. Specifically, there was no significant main effect of treatment (saline versus  
 27 ChABC) either one (A) or two (B) days after fear-conditioning ( $P > 0.05$ ). On day 1, there was a  
 28 significant interaction between ITI number and treatment driven by the first ITI, wherein saline-treated  
 29 animals, that have consolidated the fear memory of the tone, showed significantly greater freezing  
 30 during the first between-tone period (ITI1) than the ChABC animals. No significant differences were  
 31 observed during any of the other ITIs.

32 \* $P < 0.05$  vs. vehicle. All values are means  $\pm$  SEM

33

34

35

36

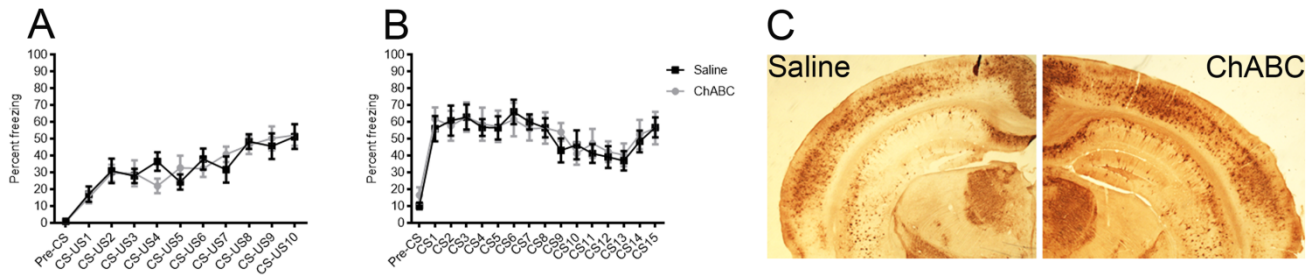

37

38 **Figure S4. Related to Figure 5. After regrowth of PNNs 3 months after ChABC treatment no**  
 39 **differences in fear expression are observed between saline and ChABC groups**

40 Mice were retrained to a 11kHz tone 3 months after the ChABC/saline treatment. There were no  
 41 differences in either fear conditioning (A) or fear expression 24 hours after fear conditioning (B)  
 42 between saline and ChABC groups and PNN expression was similar to saline controls (C).

43 \* $P < 0.05$  vs. vehicle. All values are means  $\pm$ SEM

44

45
